# Supplementary material
Source: Royal Society of Chemistry journal article supplement (doi:10.1039/d6qi00156d)
Supplement: d6qi00156d1.pdf [file d6qi00156d1.pdf]

Supplementary Information for:

# Simple and Low-Cost Ionic Plastic Crystal for Multipurpose Cold-Storage and Barocaloric Thermal Management

*Pedro Dafonte-Rodríguez,<sup>a</sup> Ángel Ferradanes-Martínez,<sup>a</sup> Julian Walker,<sup>b</sup>  
Javier García-Ben,<sup>a</sup> Charles James McMonagle,<sup>c</sup> Socorro Castro-García,<sup>a</sup>  
María Antonia Señarís-Rodríguez,<sup>a</sup> Manuel Sánchez-Andújar<sup>\*a</sup> and Juan  
Manuel Bermúdez-García<sup>\*a</sup>*

<sup>a</sup> CICA – Centro Interdisciplinar de Química e Bioloxía and Departamento de Química,  
Facultade de Ciencias, Universidade da Coruña, Campus de Elviña, 15071, A Coruña, Spain.

<sup>b</sup> Norwegian University of Science and Technology, Department of Materials Science and  
Engineering, Trondheim 7491, Norway.

<sup>c</sup> European Synchrotron Radiation Facility, Swiss-Norwegian Beamlines, Grenoble 3843,  
France.

E-mail: [m.andujar@udc.es](mailto:m.andujar@udc.es); [j.bermudez@udc.es](mailto:j.bermudez@udc.es)

## Contents

|                  |    |
|------------------|----|
| Figure S1 .....  | 1  |
| Figure S2. ....  | 1  |
| Figure S3 .....  | 2  |
| Figure S4. ....  | 3  |
| Figure S5. ....  | 3  |
| Figure S6. ....  | 4  |
| Figure S7. ....  | 5  |
| Figure S8. ....  | 5  |
| Figure S9. ....  | 6  |
| Figure S10 ..... | 7  |
| Figure S11. .... | 8  |
| Figure S12. .... | 8  |
| Figure S13 ..... | 9  |
| Figure S14. .... | 10 |
| Figure S15 ..... | 11 |
| Table S1.....    | 12 |
| Table S2.....    | 13 |
| Table S3.....    | 14 |
| Table S4.....    | 15 |
| Table S5.....    | 16 |
| Table S6.....    | 18 |
| References ..... | 20 |

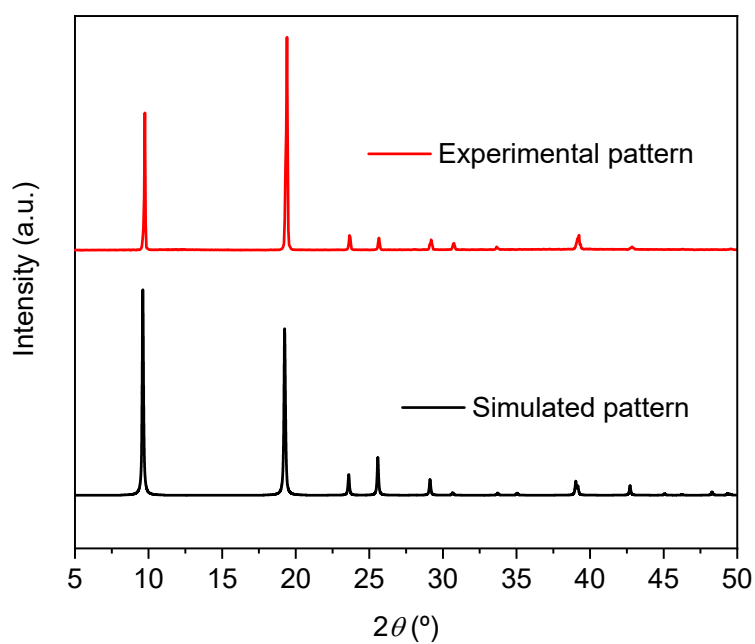

**Figure S1.** Room temperature experimental PXRD patterns for the obtained [CH<sub>3</sub>NH<sub>3</sub>][BF<sub>4</sub>] compound compared with the simulated pattern based on the reported single crystal structure at room temperature.

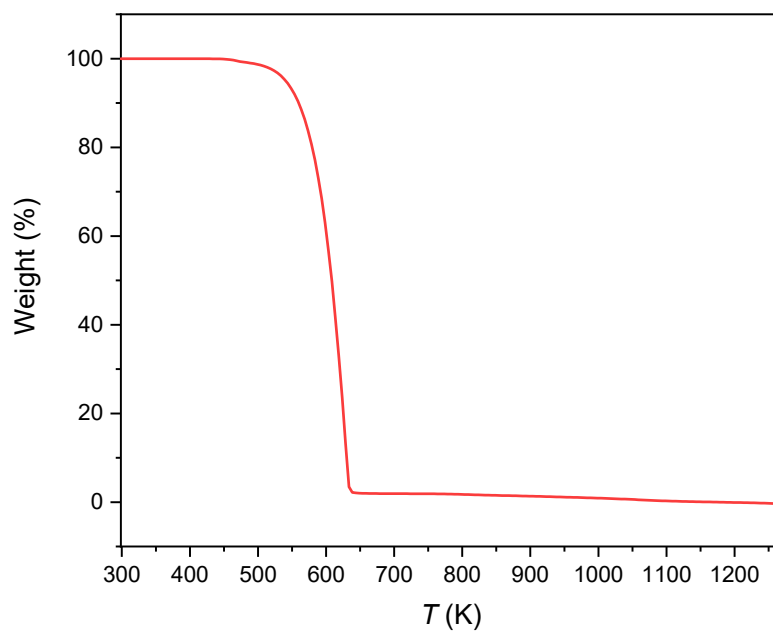

**Figure S2.** Thermogravimetric analysis of [CH<sub>3</sub>NH<sub>3</sub>][BF<sub>4</sub>] under N<sub>2</sub> atmosphere.

(a)

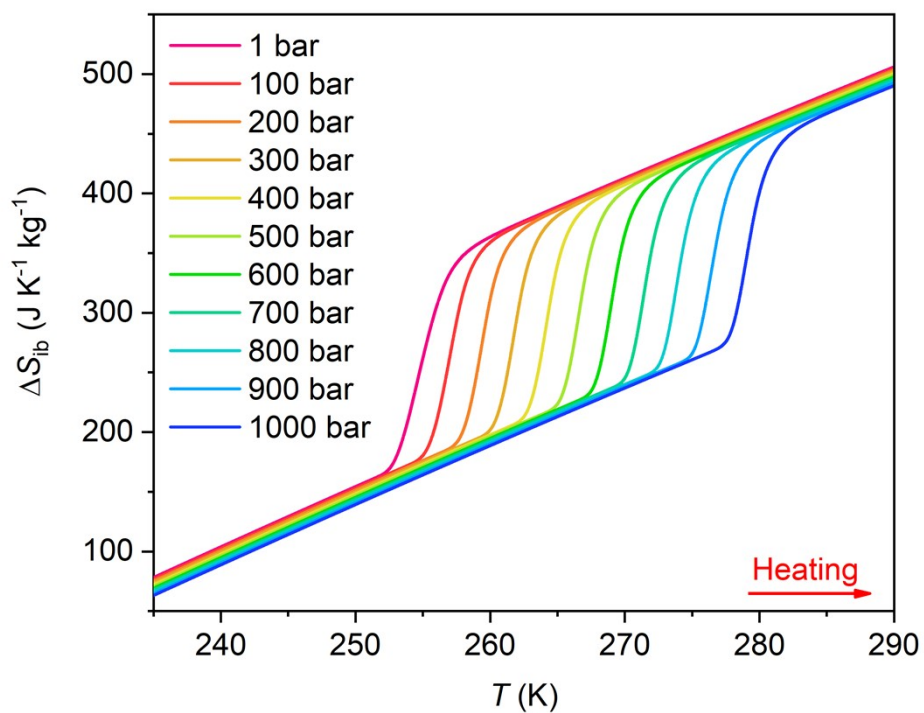

(b)

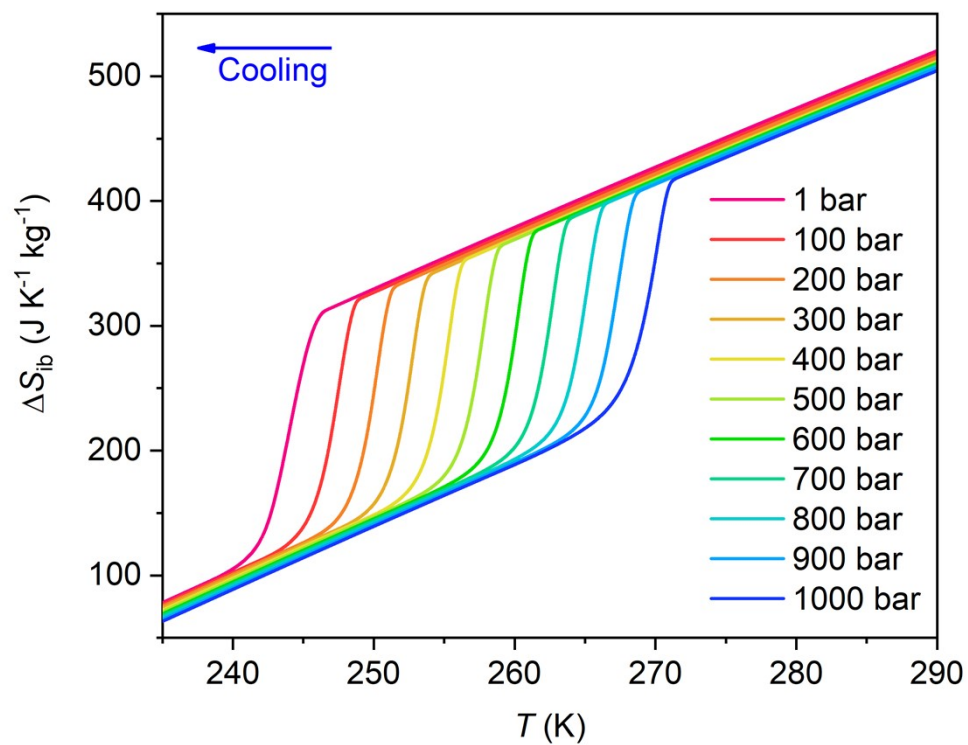

**Figure S3.**  $\Delta S_{ib}$  at different isobaric conditions during (a) heating and (b) cooling.

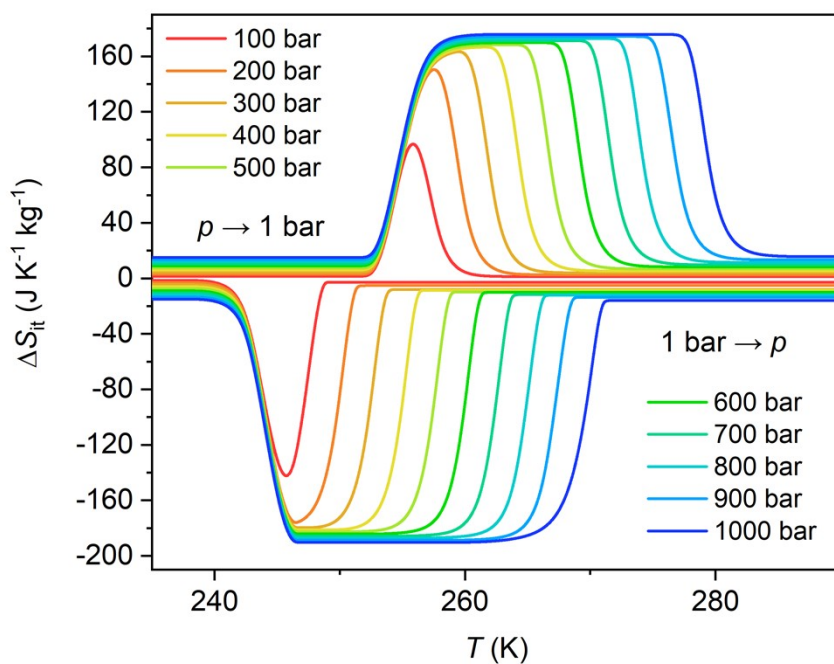

**Figure S4.** Irreversible pressure-driven isothermal entropy changes ( $\Delta S_{it}$ ) on compression ( $1 \text{ bar} \rightarrow p$ ) and decompression ( $p \rightarrow 1 \text{ bar}$ ).

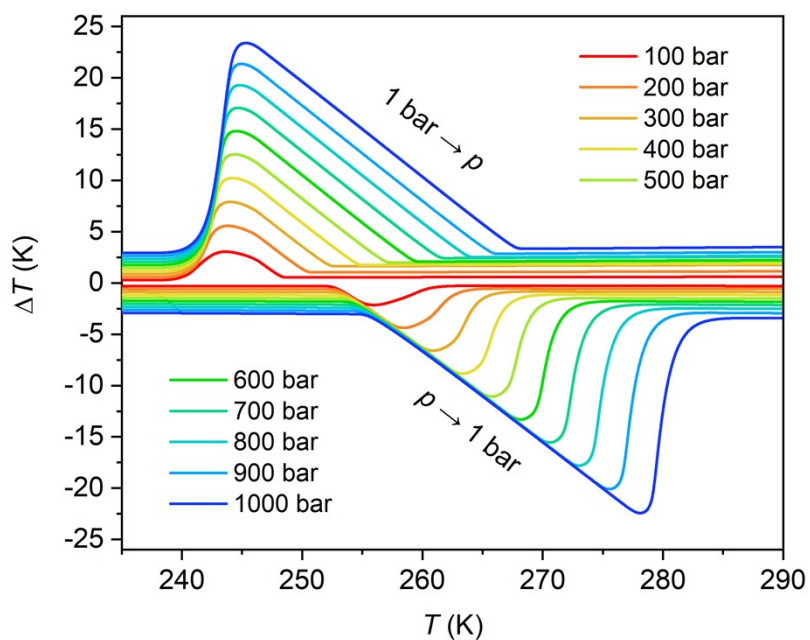

**Figure S5.** Irreversible adiabatic temperature ( $\Delta T$ ) changes on applying ( $1 \text{ bar} \rightarrow p$ ) and removing ( $p \rightarrow 1 \text{ bar}$ ) pressure at different isobaric pressures.

(a)

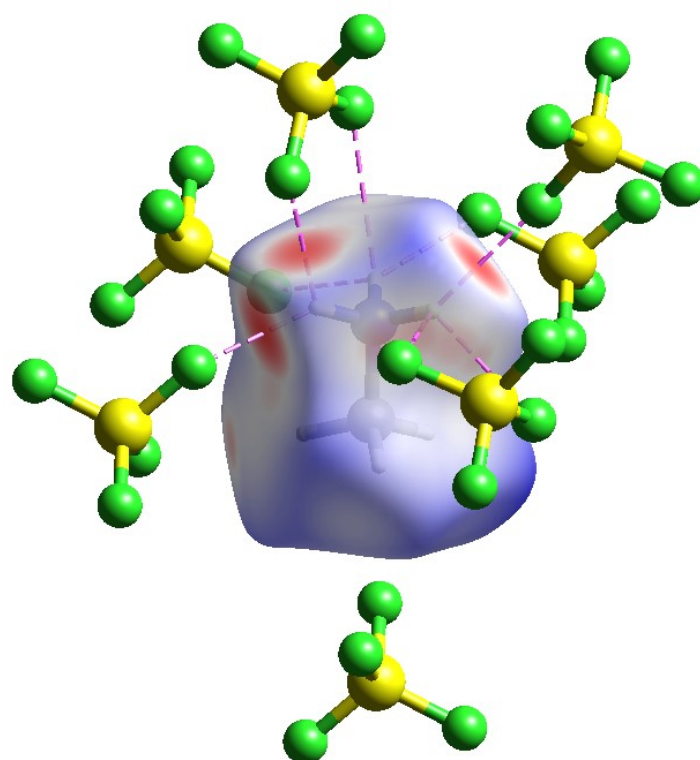

(b)

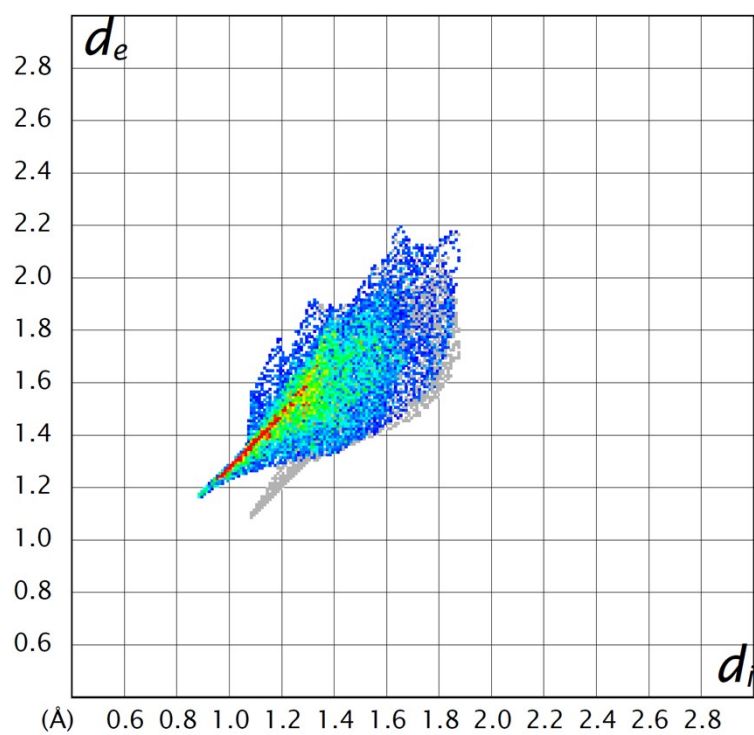

**Figure S6.** (a) Hirshfeld surface analysis of [CH<sub>3</sub>NH<sub>3</sub>]<sup>+</sup> cations, showing the  $d_{\text{norm}}$  surface and (b) two-dimensional fingerprint plot showing the F...H interactions.

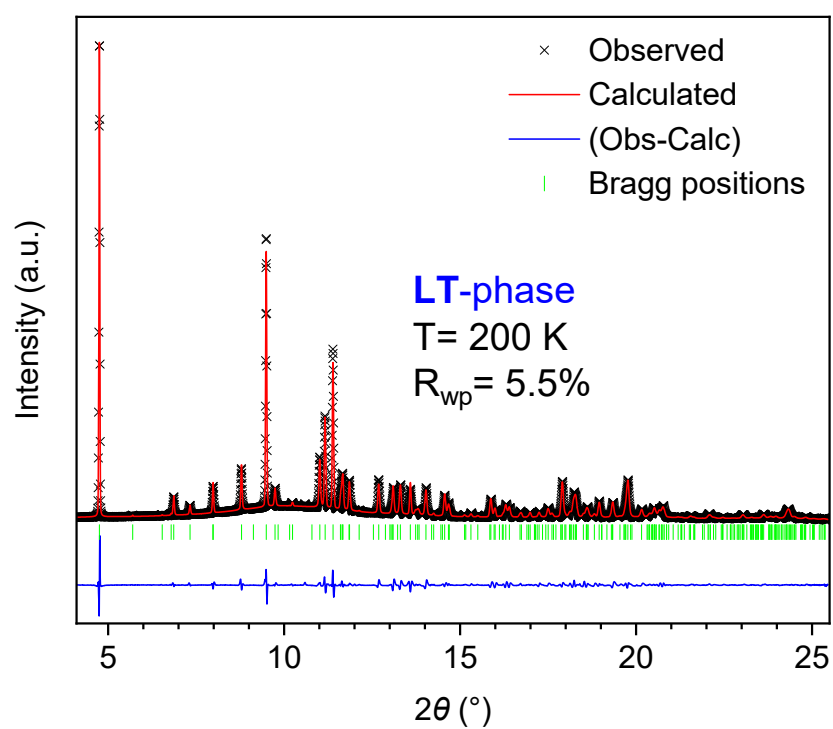

**Figure S7.** Le Bail refinement of LT-phase of  $[\text{CH}_3\text{NH}_3][\text{BF}_4]$  at  $T = 200$  K.

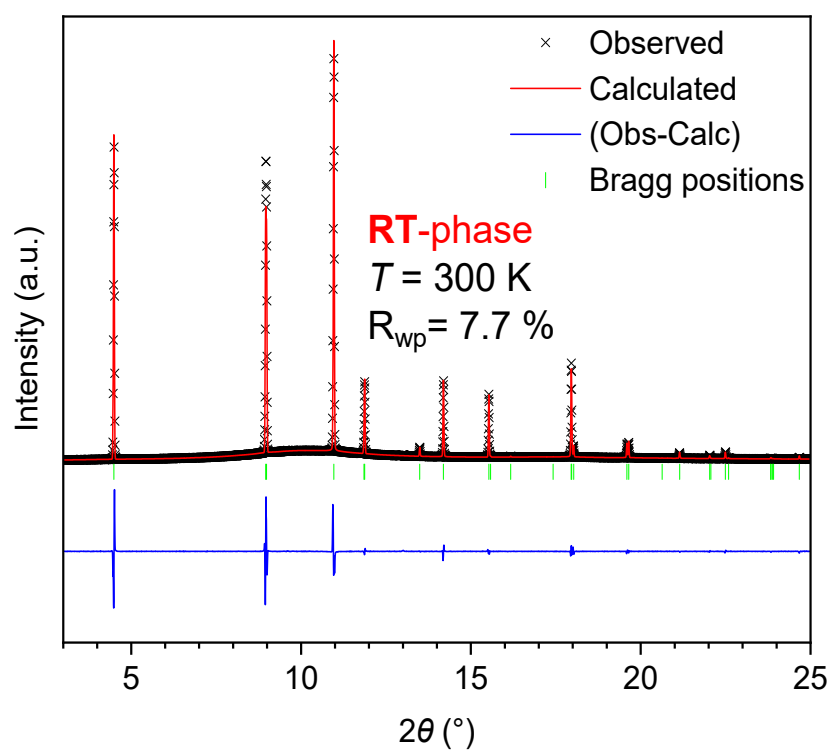

**Figure S8.** Le Bail refinement of RT-phase of  $[\text{CH}_3\text{NH}_3][\text{BF}_4]$  at  $T = 300$  K.

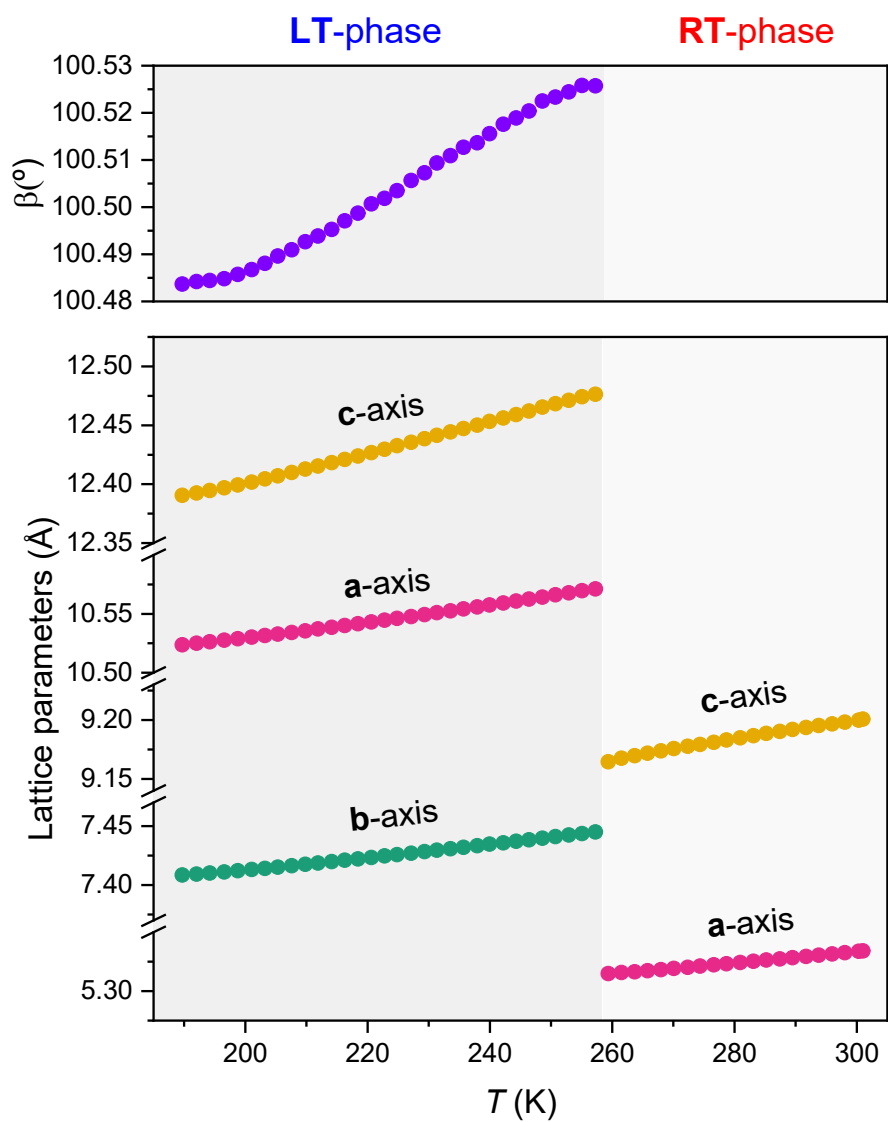

**Figure S9.** Evolution of the lattice parameters of  $[\text{CH}_3\text{NH}_3][\text{BF}_4]$  as a function of temperature.

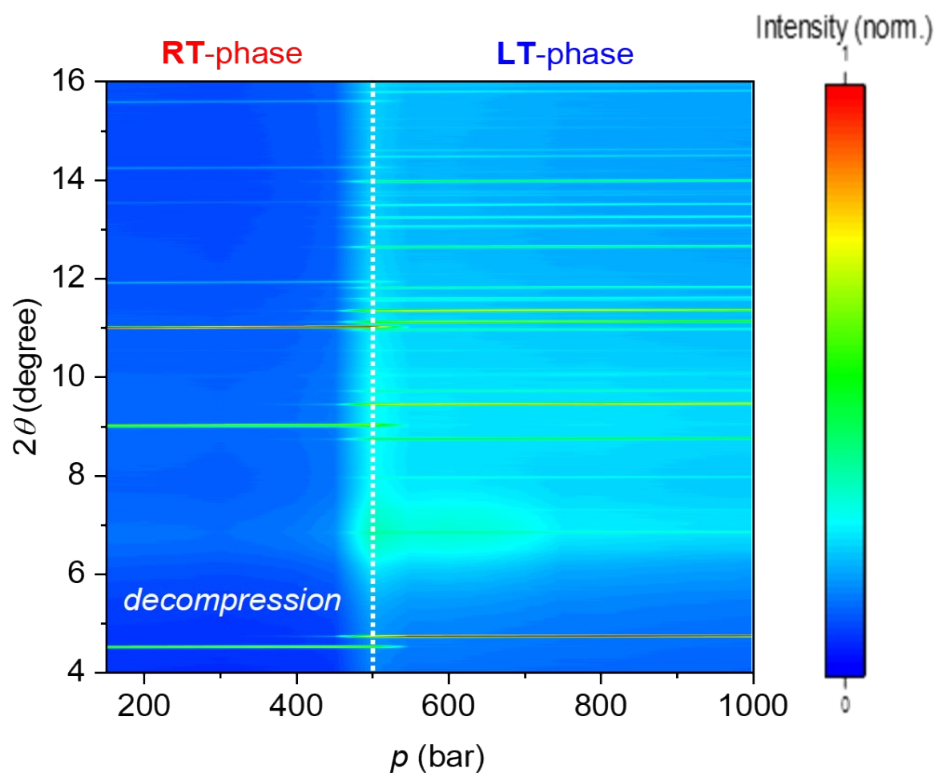

**Figure S10.** Contour plot of SPXRD patterns under decompression at  $T = 264$  K.

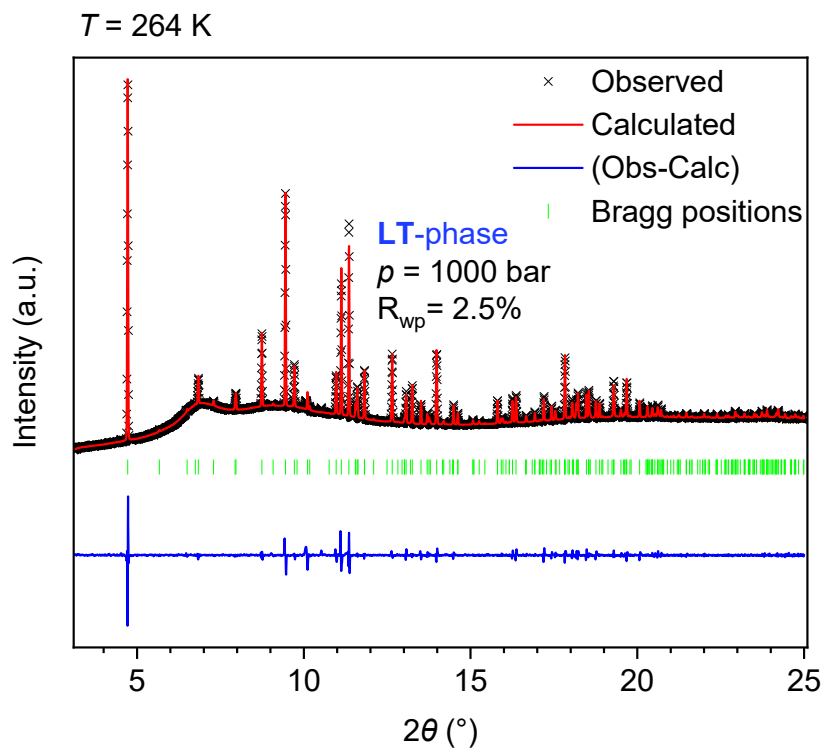

**Figure S11.** Le Bail refinement of LT-phase of  $[\text{CH}_3\text{NH}_3][\text{BF}_4]$  at  $p = 1000 \text{ bar}$  and  $T = 264 \text{ K}$ .

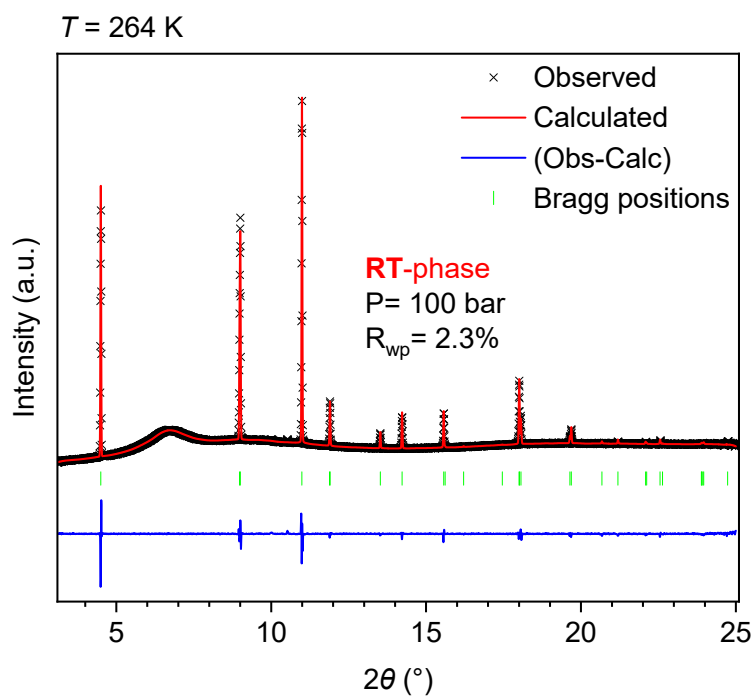

**Figure S12.** Le Bail refinement of RT-phase of  $[\text{CH}_3\text{NH}_3][\text{BF}_4]$  at  $p = 1000 \text{ bar}$  and  $T = 264 \text{ K}$ .

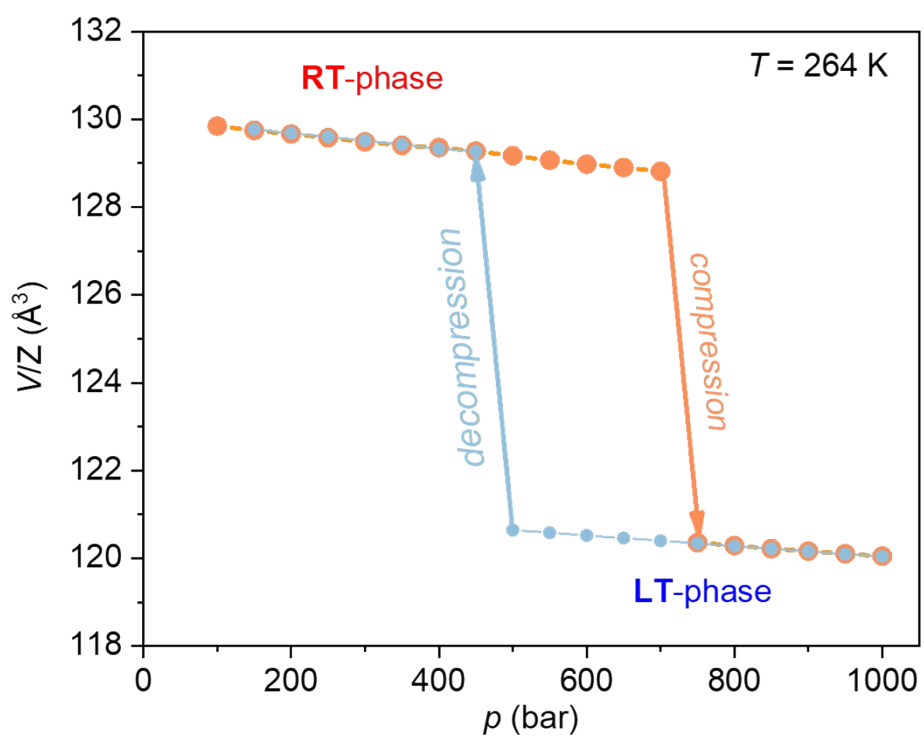

**Figure S13.** Cell volume of the  $[\text{CH}_3\text{NH}_3][\text{BF}_4]$  compound under compression and decompression at  $T = 264$  K.

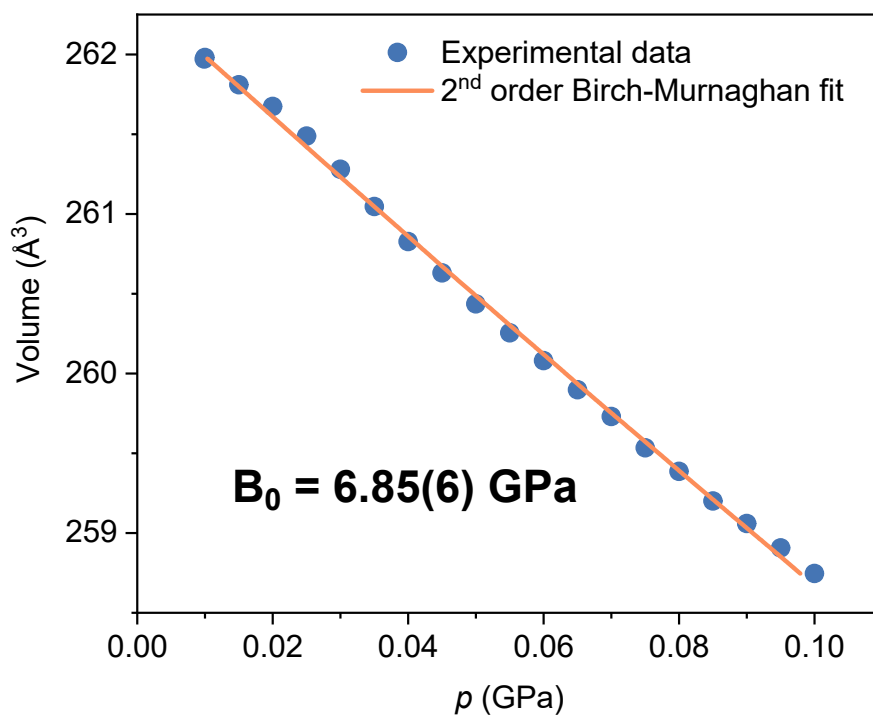

**Figure S14.** Experimental volume vs. pressure data for the RT-phase collected at room temperature (blue dots) and fit of the second-order Birch-Murnaghan equation of state for the estimation of the isothermal bulk modulus.

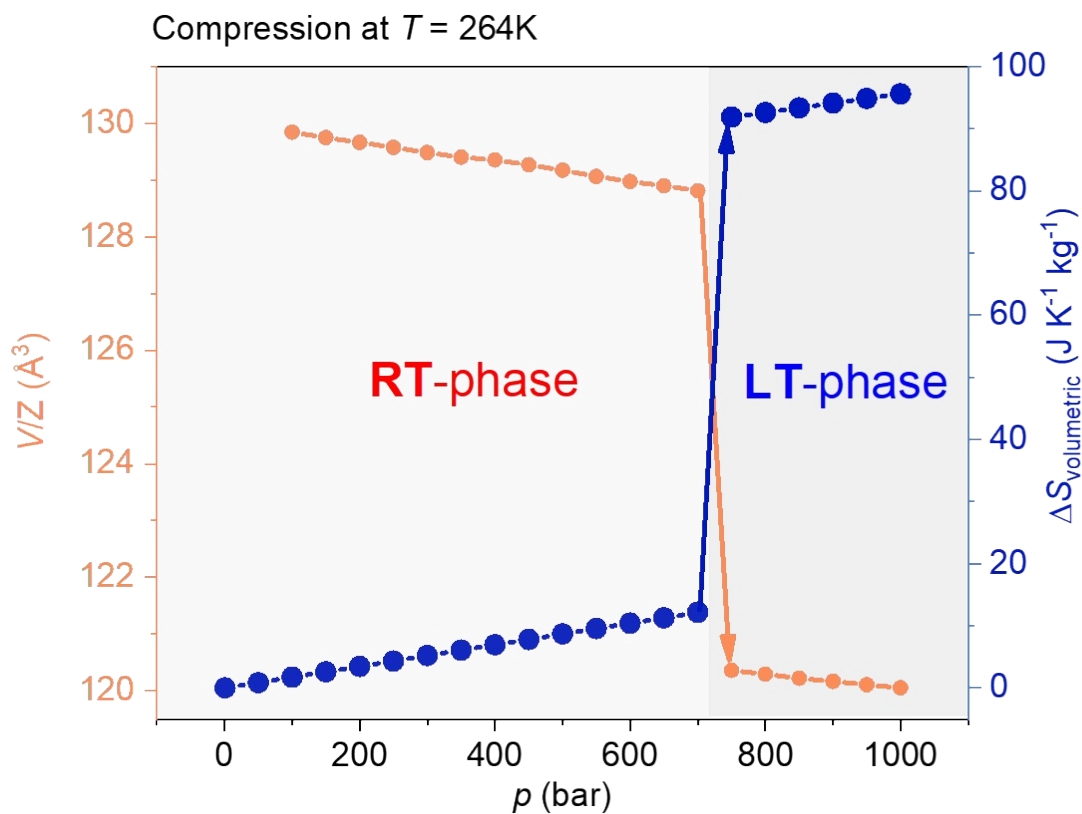

**Figure S15.** Evolution of the volume of LT- and RT-phase of  $[\text{CH}_3\text{NH}_3][\text{BF}_4]$  compound as a function of pressure in compression and volumetric entropy change associated with the volume change at the phase transition and the elastic entropy change due the lattice shrinkage on either side of the phase transition at  $T = 264\text{ K}$ .

**Table S1.** Price comparison in euros per gram (€/g) for different commercial plastic crystals reported for barocaloric and/or thermal energy storage applications, in comparison with [DBA][BF<sub>4</sub>] and the [CH<sub>3</sub>NH<sub>3</sub>][BF<sub>4</sub>] compound.<sup>1-8</sup> Prices were consulted in March 2026.

| Material                                                           | CAS number  | Price per gram | Consulted Supplier | Reference |
|--------------------------------------------------------------------|-------------|----------------|--------------------|-----------|
| <b>C<sub>60</sub></b>                                              | 99685-96-8  | 346.00 €/g     | Fisher Scientific  | 1         |
| <b>m-carborane</b>                                                 | 16986-24-6  | 195.00€/g      | abcr GmbH          | 2         |
| <b>o-carborane</b>                                                 | 16872-09-6  | 116.00 €/g     | abcr GmbH          | 2         |
| <b>[N<sub>2222</sub>][TFSI]</b>                                    | 161401-26-9 | 61.00 €/g      | Sigma-Aldrich      | 3         |
| <b>[C<sub>3</sub>mpyr][FSI]</b>                                    | 852620-97-4 | 25.00 €/g      | Cymit Química      | 3         |
| <b>1-Cl-adamantane</b>                                             | 935-56-8    | 10.56 €/g      | Sigma-Aldrich      | 4         |
| <b>2-methyl-2-nitro-1-propanol</b>                                 | 76-39-1     | 5.84 €/g       | Cymit Química      | 5         |
| <b>(CH<sub>3</sub>)<sub>2</sub>C(CH<sub>2</sub>OH)<sub>2</sub></b> | 126-30-7    | 1.59 €/g       | Sigma-Aldrich      | 6         |
| <b>NH<sub>2</sub>C(CH<sub>2</sub>OH)<sub>3</sub></b>               | 77-86-1     | 0.68 €/g       | Fluorochem         | 7         |
| <b>[CH<sub>3</sub>NH<sub>3</sub>][BF<sub>4</sub>]*</b>             | -           | 0.44 €/g       | Sigma-Aldrich      | This work |
| <b>[DBA][BF<sub>4</sub>]*</b>                                      | -           | 0.35 €/g       | Sigma-Aldrich      | 8         |

\* Prices were estimated solely based on the quantities of reagents used to obtain 1 g of material. The purities of the reagents considered in each case are those listed in this work and in reference 8, respectively. DBA: (CH<sub>3</sub>(CH<sub>2</sub>)<sub>3</sub>)<sub>2</sub>NH<sub>2</sub><sup>+</sup>

**Table S2.** Crystallographic data for [CH<sub>3</sub>NH<sub>3</sub>][BF<sub>4</sub>] at *T* = 100 K and 298 K.

|                                   | [CH <sub>3</sub> NH <sub>3</sub> ][BF <sub>4</sub> ]       | [CH <sub>3</sub> NH <sub>3</sub> ][BF <sub>4</sub> ]         |
|-----------------------------------|------------------------------------------------------------|--------------------------------------------------------------|
|                                   | LT-phase                                                   | RT-phase                                                     |
| CCDC number                       | 2454145                                                    | 2454146                                                      |
| Empirical formula                 | CH <sub>6</sub> NBF <sub>4</sub>                           | CH <sub>6</sub> NBF <sub>4</sub>                             |
| Formula weight                    | 118.88 g/mol                                               | 118.88 g/mol                                                 |
| Temperature                       | 100.00 K                                                   | 298.00 K                                                     |
| Crystal system                    | Monoclinic                                                 | Tetragonal                                                   |
| Space group                       | P2 <sub>1</sub> /n                                         | P4/nmm                                                       |
| a                                 | 10.462(3) Å                                                | 5.33470(10) Å                                                |
| b                                 | 7.3498(18) Å                                               | 5.33470(10) Å                                                |
| c                                 | 12.266(3) Å                                                | 9.2028(4) Å                                                  |
| α                                 | 90°                                                        | 90°                                                          |
| β                                 | 100.481(7)°                                                | 90°                                                          |
| γ                                 | 90°                                                        | 90°                                                          |
| Volume                            | 927.5(4) Å <sup>3</sup>                                    | 261.903(15) Å <sup>3</sup>                                   |
| Z                                 | 8                                                          | 2                                                            |
| ρ <sub>calc</sub>                 | 1.703 g/cm <sup>3</sup>                                    | 1.431 g/cm <sup>3</sup>                                      |
| μ                                 | 0.213 mm <sup>-1</sup>                                     | 0.186 mm <sup>-1</sup>                                       |
| F(000)                            | 480.0                                                      | 108.0                                                        |
| Crystal size                      | 0.088 × 0.076 × 0.029 mm <sup>3</sup>                      | 0.088 × 0.076 × 0.029 mm <sup>3</sup>                        |
| Radiation                         | MoKα (λ = 0.71073)                                         | MoKα (λ = 0.71073)                                           |
| 2θ range for data collection/°    | 4.714 to 50.794°                                           | 13.304 to 56.57°                                             |
| Index ranges                      | -12 ≤ h ≤ 12<br>-8 ≤ k ≤ 8<br>-14 ≤ l ≤ 14                 | -7 ≤ h ≤ 6<br>-7 ≤ k ≤ 7<br>-12 ≤ l ≤ 12                     |
| Reflections collected             | 1632                                                       | 5556                                                         |
| Independent reflections           | 1632 [R <sub>int</sub> = 0.0, R <sub>sigma</sub> = 0.1251] | 202 [R <sub>int</sub> = 0.0481, R <sub>sigma</sub> = 0.0160] |
| Data / restraints / parameters    | 1632 / 0 / 119                                             | 202 / 0 / 27                                                 |
| Goodness-of-fit on F <sup>2</sup> | 1.113                                                      | 2.045                                                        |
| Final R indexes [I ≥ 2σ (I)]      | R <sub>1</sub> = 0.1379<br>wR <sub>2</sub> = 0.2825        | R <sub>1</sub> = 0.1265<br>wR <sub>2</sub> = 0.4133          |
| Final R indexes [all data]        | R <sub>1</sub> = 0.2098<br>wR <sub>2</sub> = 0.3130        | R <sub>1</sub> = 0.1457<br>wR <sub>2</sub> = 0.4476          |
| Largest diff. peak/hole           | 0.54 / -0.49 e Å <sup>-3</sup>                             | 0.12 / -0.18 e Å <sup>-3</sup>                               |

**Table S3.** Bond lengths for LT-phase (100 K) and RT-phase (298 K) of [CH<sub>3</sub>NH<sub>3</sub>][BF<sub>4</sub>].

| <i>F – B bonds</i> |             |                   |
|--------------------|-------------|-------------------|
| <b>Atom</b>        | <b>Atom</b> | <b>Length (Å)</b> |
| F001               | B00D        | 1.392(14)         |
| F002               | B00D        | 1.389(14)         |
| F006               | B00D        | 1.384(13)         |
| F008               | B00D        | 1.400(14)         |
| F003               | B00E        | 1.409(14)         |
| F004               | B00E        | 1.385(13)         |
| F005               | B00E        | 1.404(14)         |
| F007               | B00E        | 1.385(14)         |
| <i>N – C bonds</i> |             |                   |
| <b>Atom</b>        | <b>Atom</b> | <b>Length (Å)</b> |
| N009               | C00B        | 1.442(12)         |
| N00A               | C00C        | 1.459(13)         |

**Table S4.** Bond angles for LT-phase of [CH<sub>3</sub>NH<sub>3</sub>][BF<sub>4</sub>].

| <i>F – B bonds</i> |             |             |                  |
|--------------------|-------------|-------------|------------------|
| <b>Atom</b>        | <b>Atom</b> | <b>Atom</b> | <b>Angle (°)</b> |
| F001               | B00D        | F008        | 110.1(10)        |
| F002               | B00D        | F001        | 109.5(9)         |
| F002               | B00D        | F008        | 108.3(9)         |
| F006               | B00D        | F001        | 108.9(9)         |
| F006               | B00D        | F002        | 110.3(10)        |
| F006               | B00D        | F008        | 109.7(9)         |
| F004               | B00E        | F003        | 108.7(10)        |
| F004               | B00E        | F005        | 108.4(9)         |
| F004               | B00E        | F007        | 111.2(9)         |
| F005               | B00E        | F003        | 108.7(8)         |
| F007               | B00E        | F003        | 109.2(9)         |
| F007               | B00E        | F005        | 110.5(10)        |

**Table S5.** Transition temperature ( $T_t$ ) and enthalpy ( $\Delta H$ ) of some representative materials belonging to the SS and SL-PCMs families presented in Figure 3a.

| Material                                              | Type                                     | $T_m^a$ (K)  | $\Delta H$ (J g <sup>-1</sup> ) | Reference |
|-------------------------------------------------------|------------------------------------------|--------------|---------------------------------|-----------|
| <b>SS-PCMs</b>                                        |                                          |              |                                 |           |
| <b>PE</b>                                             | Polyalcohol                              | 458.4        | 339.5                           | 9         |
| <b>NPG</b>                                            | Polyalcohol                              | 315.4        | 119.1                           | 9         |
| <b>TAM</b>                                            | Polyalcohol                              | 405.4        | 295.6                           | 9         |
| <b>C<sub>10</sub>Mn</b>                               | Layered hybrid perovskite                | 305.8        | 70.34                           | 9         |
| <b>C<sub>12</sub>Co</b>                               | Layered hybrid perovskite                | 333.7-361    | 92.89                           | 9         |
| <b>C<sub>14</sub>Cu</b>                               | Layered hybrid perovskite                | 342.2-352.5  | 163.99                          | 9         |
| <b>C<sub>10</sub>Zn</b>                               | Layered hybrid perovskite                | 353.1-435.8- | 100.92                          | 9         |
| <b>SAN-g-PA</b>                                       | Polymeric                                | 284.6-296.7  | 11.6-23.7                       | 9         |
| <b>Cellulose-g-PEG</b>                                | Polymeric                                | 315.8-333.1  | 77.6-203.2                      | 9         |
| <b>PUPCM</b>                                          | Polymeric                                | 338.28       | 138.7                           | 9         |
| <b>PEG/MDI/PVA</b>                                    | Polymeric                                | 334.1        | 72.8                            | 9         |
| <b>[C<sub>13</sub>mpyr][FSI]</b>                      | Organic ionic plastic crystal            | 245          | 47                              | 3         |
| <b>[N<sub>2222</sub>][TFSI]</b>                       | Organic ionic plastic crystal            | 277          | 45                              | 3         |
| <b>[C<sub>2</sub>mmor][FSI]</b>                       | Organic ionic plastic crystal            | 283          | 68                              | 3         |
| <b>[CH<sub>3</sub>NH<sub>3</sub>][BF<sub>4</sub>]</b> | Hybrid organic-inorganic plastic crystal | 254          | 42                              | This work |
| <b>1-Cl-adamantane</b>                                | Organic plastic crystal                  | 254          | 32                              | 4         |
| <b>[DBA][BF<sub>4</sub>]<sup>b</sup></b>              | Hybrid organic-inorganic plastic crystal | 269          | 58                              | 8         |

**Table S5.** (continued)

| <b>Material</b>                                    | <b>Type</b>                   | <b><math>T_m^a)</math> (K)</b> | <b><math>\Delta H</math> (J g<sup>-1</sup>)</b> | <b>Reference</b> |
|----------------------------------------------------|-------------------------------|--------------------------------|-------------------------------------------------|------------------|
| <b>SL-PCMS</b>                                     |                               |                                |                                                 |                  |
| <b>K<sub>2</sub>PO<sub>4</sub>·6H<sub>2</sub>O</b> | Salt hydrate                  | 277                            | 109                                             | 10               |
| <b>LiClO<sub>3</sub>·3H<sub>2</sub>O</b>           | Salt hydrate                  | 281.1                          | 253                                             | 10               |
| <b>KF·4H<sub>2</sub>O</b>                          | Salt hydrate                  | 291.5                          | 231                                             | 10               |
| <b>Dodecane</b>                                    | Paraffin                      | 263.4                          | 216                                             | 10               |
| <b>Caprylic acid</b>                               | Fatty acid                    | 289                            | 148.5                                           | 10               |
| <b>Paraffin C<sub>16</sub></b>                     | Paraffin                      | 289.7                          | 237.1                                           | 10               |
| <b>Isopropyl stearate</b>                          | Fatty acid<br>derivate        | 287-291                        | 140-142                                         | 10               |
| <b>Acetic acid</b>                                 | Fatty acid                    | 289.7                          | 184                                             | 10               |
| <b>51 wt% ZnCl<sub>2</sub></b>                     | Inorganic<br>eutectic mixture | 210                            | 116.84                                          | 11               |
| <b>17.1 wt% MgCl<sub>2</sub></b>                   | Inorganic<br>eutectic mixture | 239.4                          | 221.8                                           | 11               |
| <b>41.2 wt% NH<sub>4</sub>NO<sub>3</sub></b>       | Inorganic<br>eutectic mixture | 255.6                          | 186.29                                          | 11               |
| <b>10 wt% NaCl</b>                                 | Inorganic<br>eutectic mixture | 268.15                         | 289                                             | 11               |
| <b>Tetradecane +<br/>octadecane</b>                | Organic eutectic<br>mixture   | 268.98                         | 227.52                                          | 10               |
| <b>Tetradecane +<br/>docosane</b>                  | Organic eutectic<br>mixture   | 274.5-278.6                    | 234.33                                          | 10               |
| <b>Pentadecane +<br/>octadecane</b>                | Organic eutectic<br>mixture   | 281.5-282                      | 271.93                                          | 10               |
| <b>Pentadecane +<br/>docosane</b>                  | Organic eutectic<br>mixture   | 280.6-281.99                   | 214.83                                          | 10               |

<sup>a)</sup>In this context,  $T_t = T_m$  or melting temperature, as reported in the literature for most PCMs. <sup>b)</sup> Only the most energetic phase transition was considered.

**Table S6.** Barocaloric parameters of the different barocaloric materials represented in Figure 3b.

| Material                                                                   | $T_t$ (K) | $p$ (bar) | $dT/dp$<br>(K kbar <sup>-1</sup> ) | $\Delta S_{rev}$<br>(J K <sup>-1</sup> kg <sup>-1</sup> ) | $\Delta T_{rev}$ (K) | Reference |
|----------------------------------------------------------------------------|-----------|-----------|------------------------------------|-----------------------------------------------------------|----------------------|-----------|
| <b>Metallic Alloys</b>                                                     |           |           |                                    |                                                           |                      |           |
| LaFe <sub>11.33</sub> Co <sub>0.47</sub> Si <sub>1.2</sub>                 | 250       | 2000      | 9.4                                | 8.7 <sup>a)</sup>                                         | -                    | 12        |
| Gd <sub>2</sub> Si <sub>5</sub> Ge <sub>5</sub>                            | 260       | 2000      | 3.5                                | 6.2 <sup>a)</sup>                                         | -                    | 13        |
| Mn <sub>3</sub> NiN                                                        | 262       | 2800      | 1.4                                | 35 <sup>a)</sup>                                          | 3.4 <sup>c)</sup>    | 14        |
| Ni <sub>44.5</sub> Co <sub>5.5</sub> Mn <sub>35.5</sub> In <sub>14.4</sub> | 272       | 6000      | 4.4                                | 15.6 <sup>a)</sup>                                        | 6 <sup>c)</sup>      | 15        |
| Ni <sub>0.95</sub> Fe <sub>0.05</sub> S                                    | 274       | 1000      | 7.5                                | 39.6 <sup>a)</sup>                                        | 8 <sup>c)</sup>      | 16        |
| Ni <sub>2.00</sub> Mn <sub>1.32</sub> In <sub>0.68</sub>                   | 275       | 2500      | 1.88                               | 4                                                         | 3 <sup>c)</sup>      | 17        |
| Co <sub>50</sub> Fe <sub>2.5</sub> V <sub>31.5</sub> Ga <sub>16</sub>      | 277       | 5000      | 2.5                                | 31                                                        | 6                    | 18        |
| MnNiSi <sub>0.60</sub> FeCoGe <sub>0.40</sub>                              | 280       | 2300      | 7.3                                | 47                                                        | 4                    | 19        |
| MnCoGeB <sub>0.03</sub>                                                    | 286       | 2600      | 10                                 | 30                                                        | 15 <sup>c)</sup>     | 20        |
| Mn <sub>3</sub> GaN                                                        | 290       | 930       | 6.5                                | 21.6 <sup>a)</sup>                                        | 1.3 <sup>c)</sup>    | 21        |
| Ni <sub>35.5</sub> Co <sub>14.5</sub> Mn <sub>35</sub> Ti <sub>15</sub>    | 291       | 1000      | 5                                  | 8.5                                                       | 4.2 <sup>c)</sup>    | 22        |
| Ni <sub>49.26</sub> Mn <sub>36.08</sub> In <sub>14.66</sub>                | 293       | 2500      | 1.8                                | 10 <sup>a)</sup>                                          | 9.4 <sup>c)</sup>    | 23        |
| Ni <sub>0.875</sub> Fe <sub>0.125</sub> S                                  | 294       | 1000      | 7.5                                | 49.5 <sup>a)</sup>                                        | -                    | 16        |
| <b>Spin-Crossover Materials (SCO)</b>                                      |           |           |                                    |                                                           |                      |           |
| [FeL <sub>2</sub> ][BF <sub>4</sub> ] <sub>2</sub>                         | 257       | 430       | 15                                 | 68 <sup>a)</sup>                                          | 4                    | 24        |
| [Fe(hyptrz) <sub>3</sub> ] <sub>3</sub> A <sub>2</sub> ·H <sub>2</sub> O   | 273       | 900       | 33.2                               | 56 <sup>a)</sup>                                          | 10                   | 25        |
| <b>Ammonium Salts</b>                                                      |           |           |                                    |                                                           |                      |           |
| NH <sub>4</sub> I                                                          | 268       | 800       | 81                                 | 71                                                        | 34 <sup>c)</sup>     | 26        |
| <b>Organic Plastic Crystals</b>                                            |           |           |                                    |                                                           |                      |           |
| C <sub>10</sub> H <sub>15</sub> Cl                                         | 254       | 1000      | 27.4                               | 153                                                       | 16.1                 | 4         |
| C <sub>60</sub>                                                            | 257       | 1000      | 17                                 | 32                                                        | 9.7                  | 1         |
| o-carborane                                                                | 277       | 600       | 30                                 | 79                                                        | 14 <sup>b)</sup>     | 2         |
| [N <sub>2222</sub> ][TFSI]                                                 | 277       | 1000      | 23.7                               | 160                                                       | -                    | 3         |
| [C <sub>2</sub> mmor][FSI]                                                 | 283       | 1000      | 12.1                               | 184                                                       | -                    | 3         |

**Table S6.** (continued)

| Material                                                                         | $T_t$ (K) | $p$<br>(bar) | $dT/dp$<br>(K kbar <sup>-1</sup> ) | $\Delta S_{rev}$<br>(J K <sup>-1</sup> kg <sup>-1</sup> ) | $\Delta T_{rev}$ (K) | Reference |
|----------------------------------------------------------------------------------|-----------|--------------|------------------------------------|-----------------------------------------------------------|----------------------|-----------|
| <b>Organic Plastic Crystals</b>                                                  |           |              |                                    |                                                           |                      |           |
| m-carborane                                                                      | 286       | 600          | 34                                 | 71                                                        | -                    | 2         |
| <b>Hybrid Organic Inorganic Materials</b>                                        |           |              |                                    |                                                           |                      |           |
| [CH <sub>3</sub> NH <sub>3</sub> ][BF <sub>4</sub> ]                             | 254       | 1000         | 24.9                               | 175                                                       | 13                   | This work |
| [DBA][BF <sub>4</sub> ]                                                          | 269       | 1000         | 22.6                               | 238                                                       | 17                   | 8         |
| (C <sub>9</sub> H <sub>19</sub> NH <sub>3</sub> ) <sub>2</sub> MnCl <sub>4</sub> | 294       | 1000         | 17.2                               | 212                                                       | 10                   | 27        |

<sup>a</sup>)Isobaric entropy change; <sup>b</sup>)Adiabatic temperature change was calculated by indirect methods ( $\Delta T_{rev} = \Delta S \cdot T_t / C_p$ ); <sup>c</sup>) Irreversible adiabatic temperature change.

## References

- 1 J. Li, D. Dunstan, X. Lou, A. Planes, L. Mañosa, M. Barrio, J. L. Tamarit and P. Lloveras, Reversible barocaloric effects over a large temperature span in fullerite  $C_{60}$ , *J. Mater. Chem. A*, 2020, **8**, 20354–20362.
- 2 K. Zhang, R. Song, J. Qi, Z. Zhang, Z. Zhang, C. Yu, K. Li, Z. Zhang and B. Li, *Adv. Funct. Mater.*, , Colossal Barocaloric Effect in Carboranes as a Performance Tradeoff, *Adv. Funct. Mater.*, 2022, **32**, 2112622.
- 3 S. L. Piper, L. Melag, M. Kar, A. Sourjah, X. Xiao, E. F. May, K. F. Aguey-Zinsou, D. R. MacFarlane and J. M. Pringle, Organic ionic plastic crystals having colossal barocaloric effects for sustainable refrigeration, *Science*, 2025, **387**, 56–62.
- 4 A. Aznar, P. Negrier, A. Planes, L. Mañosa, E. Stern-Taulats, X. Moya, M. Barrio, J. L. Tamarit and P. Lloveras, Reversible colossal barocaloric effects near room temperature in 1-X-adamantane (X=Cl, Br) plastic crystals, *Appl. Mater. Today*, 2021, **23**, 101023.
- 5 A. Salvatori, M. Barrio, P. Negrier, S. Massip, M. Romanini, A. Aznar, P. Lloveras and J. L. Tamarit, Barocaloric response of plastic crystal 2-methyl-2-nitro-1-propanol across and far from the solid-solid phase transition, *J. Phys. Energy*, 2023, **5**, 045015.
- 6 P. Lloveras, A. Aznar, M. Barrio, P. Negrier, C. Popescu, A. Planes, L. Mañosa, E. Stern-Taulats, A. Avramenko, N. D. Mathur, X. Moya and J. L. Tamarit, , Colossal barocaloric effects near room temperature in plastic crystals of neopentylglycol, *Nat. Commun.*, 2019, **10**, 1803
- 7 A. Aznar, P. Lloveras, M. Barrio, P. Negrier, A. Planes, L. Mañosa, N. D. Mathur, X. Moya and J. L. Tamarit, Reversible and irreversible colossal barocaloric effects in plastic crystals, *J. Mater. Chem. A*, 2020, **8**, 639–647..
- 8 J. García-Ben, J. M. Bermúdez-García, R. J. C. Dixey, I. Delgado-Ferreiro, A. L. Llamas-Saiz, J. López-Beceiro, R. Artiaga, A. García-Fernández, U. B. Cappel, B. Alonso, S. Castro-García, A. E. Phillips, M. Sánchez-Andújar and M. A. Señarís-Rodríguez, Structure and thermal property relationships in the thermomaterial di-n-butylammonium tetrafluoroborate for multipurpose cooling and cold-storage, *J. Mater. Chem. A*, 2023, **11**, 22232–22247.
- 9 A. Fallahi, G. Guldentops, M. Tao, S. Granados-Focil and S. Van Dessel, Review on solid-solid phase change materials for thermal energy storage: Molecular structure and thermal properties, *Appl. Therm. Eng.*, 2017, **127**, 1427–1441.

- 10 E. Oró, A. de Gracia, A. Castell, M. M. Farid and L. F. Cabeza, Review on phase change materials (PCMs) for cold thermal energy storage applications, *Appl. Energy*, 2012, **99**, 513–533.
- 11 L. Yang, U. Villalobos, B. Akhmetov, A. Gil, J. O. Khor, A. Palacios, Y. Li, Y. Ding, L. F. Cabeza, W. L. Tan and A. Romagnoli, A comprehensive review on sub-zero temperature cold thermal energy storage materials, technologies, and applications: State of the art and recent developments, *Appl. Energy*, 2021, **288**, 116555.
- 12 L. Mañosa, D. González-Alonso, A. Planes, M. Barrio, J. L. Tamarit, I. S. Titov, M. Acet, A. Bhattacharyya and S. Majumdar, Inverse barocaloric effect in the giant magnetocaloric La-Fe-Si-Co compound, *Nat. Commun.*, 2011, **2**, 595.
- 13 S. Yuce, M. Barrio, B. Emre, E. Stern-Taulats, A. Planes, J. L. Tamarit, Y. Mudryk, K. A. Gschneidner, V. K. Pecharsky and L. Mañosa, Barocaloric effect in the magnetocaloric prototype  $Gd_5Si_2Ge_2$ , *Appl. Phys. Lett.*, 2012, **101**, 071906.
- 14 D. Boldrin, E. Mendive-Tapia, J. Zemen, J. B. Staunton, T. Hansen, A. Aznar, J. L. Tamarit, M. Barrio, P. Lloveras, J. Kim, X. Moya and L. F. Cohen, Multisite Exchange-Enhanced Barocaloric Response in  $Mn_3NiN$ , *Phys. Rev. X*, 2018, **8**, 041035.
- 15 X. He, S. Wei, Y. Kang, Y. Zhang, Y. Cao, K. Xu, Z. Li and C. Jing, Enhanced barocaloric effect produced by hydrostatic pressure-induced martensitic transformation for  $Ni_{44.6}Co_{5.5}Mn_{35.5}In_{14.4}$  Heusler alloy, *Scr. Mater.*, 2018, **145**, 58–61.
- 16 J. Lin, P. Tong, X. Zhang, Z. Wang, Z. Zhang, B. Li, G. Zhong, J. Chen, Y. Wu, H. Lu, L. He, B. Bai, L. Ling, W. Song, Z. Zhang and Y. Sun, Giant room-temperature barocaloric effect at the electronic phase transition in  $Ni_{1-x}Fe_xS$ , *Mater. Horiz.*, 2020, **7**, 2690–2695.
- 17 E. Stern-Taulats, A. Planes, P. Lloveras, M. Barrio, J. L. Tamarit, S. Pramanick, S. Majumdar, S. Yüce, B. Emre, C. Frontera and L. Mañosa, Tailoring barocaloric and magnetocaloric properties in low-hysteresis magnetic shape memory alloys, *Acta Mater.*, 2015, **96**, 324–332.
- 18 H. Liu, Z. Li, Y. Zhang, Z. Ni, K. Xu and Y. Liu, A large barocaloric effect associated with paramagnetic martensitic transformation in  $Co_{50}Fe_{2.5}V_{31.5}Ga_{16}$ , *Scr. Mater.*, 2020, **177**, 1–5.
- 19 P. Lloveras, T. Samanta, M. Barrio, I. Dubenko, N. Ali, J. L. Tamarit and S. Stadler, Giant reversible barocaloric response of  $(MnNiSi)_{1-x}(FeCoGe)_x$  ( $x = 0.39, 0.40, 0.41$ ), *APL Mater.*, 2019, **7**, 061106.

- 20 A. Aznar, P. Lloveras, J. Y. Kim, E. Stern-Taulats, M. Barrio, J. L. Tamarit, C. F. Sánchez-Valdés, J. L. Sánchez Llamazares, N. D. Mathur and X. Moya, Giant and Reversible Inverse Barocaloric Effects near Room Temperature in Ferromagnetic  $\text{MnCoGeB}_{0.03}$ , *Adv. Mater.*, 2019, **31**, 1903577.
- 21 D. Matsunami, A. Fujita, K. Takenaka and M. Kano, Giant barocaloric effect enhanced by the frustration of the antiferromagnetic phase in  $\text{Mn}_3\text{GaN}$ , *Nat. Mater.*, 2015, **14**, 73–78.
- 22 Z. Wei, Y. Shen, Z. Zhang, J. Guo, B. Li, E. Liu, Z. Zhang and J. Liu, , Low-pressure-induced giant barocaloric effect in an all-d-metal Heusler  $\text{Ni}_{35.5}\text{Co}_{14.5}\text{Mn}_{35}\text{Ti}_{15}$ , *APL Mater.*, 2020, **8**, 051101.
- 23 L. Mañosa, D. González-Alonso, A. Planes, E. Bonnot, M. Barrio, J. L. Tamarit, S. Aksoy and M. Acet, Giant solid-state barocaloric effect in the Ni-Mn-In magnetic shape-memory alloy, *Nat. Mater.*, 2010, **9**, 478–481.
- 24 S. P. Vallone, A. N. Tantillo, A. M. dos Santos, J. J. Molaison, R. Kulmaczewski, A. Chapoy, P. Ahmadi, M. A. Halcrow and K. G. Sandeman, Giant Barocaloric Effect at the Spin Crossover Transition of a Molecular Crystal, *Adv. Mater.*, 2019, **31**, 1807334.
- 25 P. J. Von Ranke, B. P. Alho, R. M. Ribas, E. P. Nobrega, A. Caldas, V. S. R. De Sousa, M. V. Colaço, L. F. Marques, D. L. Rocco and P. O. Ribeiro, Colossal refrigerant capacity in  $[\text{Fe}(\text{hyptrz})_3]_2 \cdot \text{H}_2\text{O}$  around the freezing temperature of water, *Phys. Rev. B*, 2018, **98**, 224408.
- 26 Q. Ren, J. Qi, D. Yu, Z. Zhang, R. Song, W. Song, B. Yuan, T. Wang, W. Ren, Z. Zhang, X. Tong and B. Li, Ultrasensitive barocaloric material for room-temperature solid-state refrigeration, *Nat. Commun.*, 2022, **13**, 2293
- 27 Y. Gao, H. Liu, F. Hu, H. Song, H. Zhang, J. Hao, X. Liu, Z. Yu, F. Shen, Y. Wang, H. Zhou, B. Wang, Z. Tian, Y. Lin, C. Zhang, Z. Yin, J. Wang, Y. Chen, Y. Li, Y. Song, Y. Shi, T. Zhao, J. Sun, Q. Huang and B. Shen Reversible colossal barocaloric effect dominated by disordering of organic chains in in  $(\text{CH}_3-(\text{CH}_2)_{n-1}-\text{NH}_3)_2\text{MnCl}_4$  single crystals, *NPG Asia Mater.*, 2022, **14**, 34.
